# Supplementary material for: A Comprehensive Guide to MEGA-PRESS for GABA Measurement
Source: bioRxiv or medRxiv preprint supplement (doi:10.1101/2021.11.24.21266827), 2021-11-26

# SUPPLEMENT 2

## PRISMA Flow Diagram

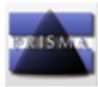

PRISMA 2009 Flow Diagram

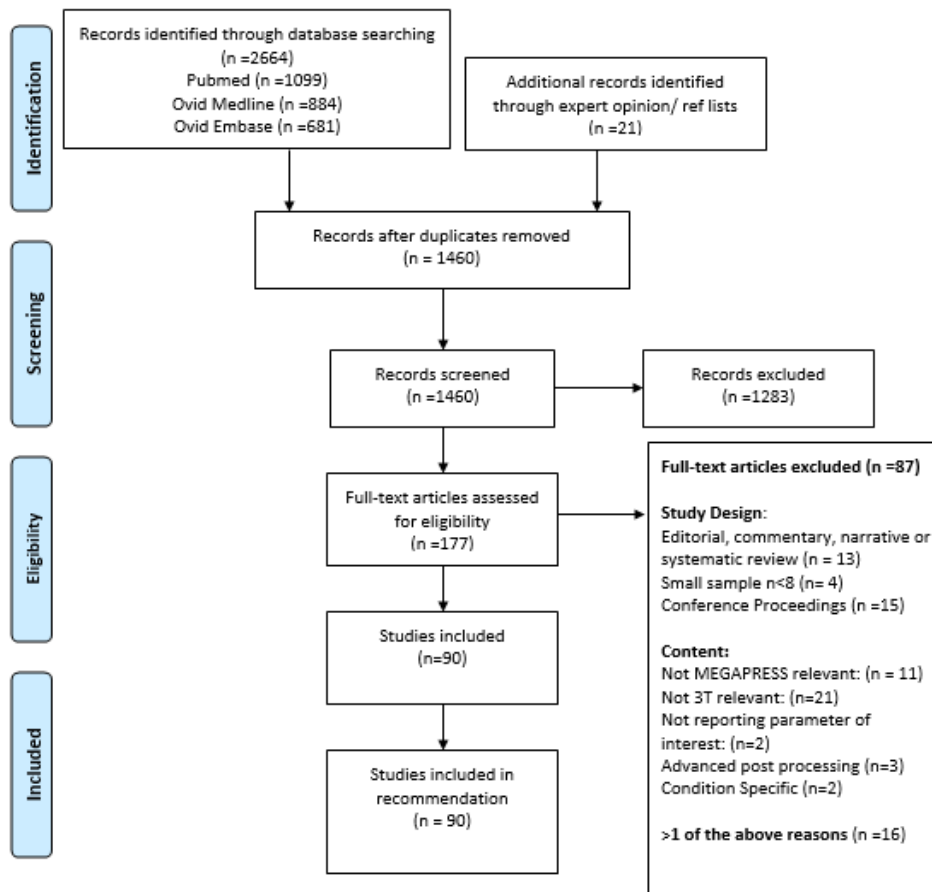

Supplement: Supplementary file [file media-2.pdf]
