# Supplementary material for: A Comprehensive Guide to MEGA-PRESS for GABA Measurement
Source: bioRxiv or medRxiv preprint supplement (doi:10.1101/2021.11.24.21266827), 2021-11-26
Supplement: Supplementary file [file media-3.pdf]

SUPPLEMENT 3

Table 1: Summary of papers used to inform the guideline

|            |                 | Papers with Recommendations        | Study Design | Level of Evidence |
|------------|-----------------|------------------------------------|--------------|-------------------|
| Parameters | Signal to noise |                                    |              |                   |
|            | - Transients    | Mullins <i>et al.</i> , 2014       | Cons         | 1                 |
|            |                 | Mikkelsen <i>et al.</i> , 2017     | MSS          | 2                 |
|            |                 | Mikkelsen <i>et al.</i> , 2019     | MSS          | 2                 |
|            |                 | Bhattacharyya <i>et al.</i> , 2007 | M            | 3                 |
|            |                 | Harris <i>et al.</i> , 2014        | M            | 3                 |
|            |                 | Brix <i>et al.</i> , 2017          | M            | 3                 |
|            |                 | Mikkelsen <i>et al.</i> , 2018     | M            | 3                 |
|            |                 | Sanaei Nezhad <i>et al.</i> , 2018 | M            | 3                 |
|            | Reporting of    | Lin <i>et al.</i> , 2020           | Cons         | 1                 |
|            |                 | Peek <i>et al.</i> , 2020          | SR           | 2                 |
|            | - Voxel Volume  | Mullins <i>et al.</i> , 2014       | Cons         | 1                 |
|            |                 | de Graaf, 2019                     | Sem          | 1                 |
|            |                 | Mikkelsen <i>et al.</i> , 2017     | MSS          | 2                 |
|            |                 | Mikkelsen <i>et al.</i> , 2019     | MSS          | 2                 |
|            |                 | Bai <i>et al.</i> , 2015           | M            | 3                 |
|            |                 | Bergmann <i>et al.</i> , 2016      | M            | 3                 |
|            |                 | Chen <i>et al.</i> , 2017          | M            | 3                 |
|            | TR              | Wilson <i>et al.</i> , 2019        | Cons         | 1                 |
|            |                 | Mikkelsen <i>et al.</i> , 2017     | MSS          | 2                 |
|            |                 | Mikkelsen <i>et al.</i> , 2019     | MSS          | 2                 |
|            |                 | Puts <i>et al.</i> , 2013;         | M            | 3                 |
|            |                 | Deelchand <i>et al.</i> , 2019     | M            | 3                 |
|            | TE              | Cudalbu <i>et al.</i> , 2020       | Cons         | 1                 |
|            |                 | Mullins <i>et al.</i> , 2014;      | Cons         | 1                 |
|            |                 | Wilson <i>et al.</i> , 2019        | Cons         | 1                 |
|            |                 | Mescher <i>et al.</i> , 1998       | SemP         | 1                 |
|            |                 | Puts <i>et al.</i> , 2012          | SR           | 2                 |
|            |                 | Mikkelsen <i>et al.</i> , 2017     | MSS          | 2                 |
|            |                 | Mikkelsen <i>et al.</i> , 2019     | MSS          | 3                 |
|            |                 | Harris <i>et al.</i> , 2015a;      | M            | 3                 |
|            |                 | Edden <i>et al.</i> , 2016;        | M            | 3                 |
|            |                 | Deelchand <i>et al.</i> , 2019     | M            | 1                 |
|            | Water Reference | Mullins <i>et al.</i> , 2014;      | Cons         | 1                 |
|            |                 | Wilson <i>et al.</i> , 2019;       | Cons         | 1                 |
|            |                 | Öz <i>et al.</i> , 2020            | Cons         | 1                 |
|            |                 | Near <i>et al.</i> , 2021          | Cons         | 1                 |
|            |                 | de Graaf, 2019                     | Sem T        | 1                 |
|            |                 | Hall <i>et al.</i> , 2014;         | M            | 3                 |

|                       |                                   |                                       |      |   |
|-----------------------|-----------------------------------|---------------------------------------|------|---|
|                       |                                   | Oeltzschner <i>et al.</i> , 2016      | M    | 3 |
|                       | Slice-selection                   | Mikkelsen <i>et al.</i> , 2017        | MSS  | 2 |
|                       | frequency of                      | Mikkelsen <i>et al.</i> , 2019        | MSS  | 2 |
|                       | water reference                   | Deelchand <i>et al.</i> , 2019        | M    | 3 |
|                       | Slice-selective                   | Ernst and Chang, 1996                 | M    | 3 |
|                       | gradients                         |                                       |      |   |
|                       | Editing pulse                     | Mullins <i>et al.</i> , 2014          | Cons | 1 |
|                       | specifications                    | Mikkelsen <i>et al.</i> , 2017        | MSS  | 2 |
|                       |                                   | Mikkelsen <i>et al.</i> , 2019        | MSS  | 2 |
|                       |                                   | Saleh <i>et al.</i> , 2019            | MSS  | 2 |
|                       |                                   | Keltner <i>et al.</i> , 1996          | M    | 3 |
|                       |                                   | Mescher <i>et al.</i> , 1998          | M    | 3 |
|                       |                                   | Henry <i>et al.</i> , 2001            | M    | 3 |
|                       |                                   | Edden <i>et al.</i> , 2016            | M    | 3 |
|                       |                                   | Deelchand <i>et al.</i> , 2019        | M    | 3 |
| <b>Practicalities</b> | Voxel Position                    | Öz <i>et al.</i> , 2020               | Cons | 1 |
|                       |                                   | Bai <i>et al.</i> , 2017              | M    | 3 |
|                       |                                   | Chen <i>et al.</i> , 2017             | M    | 3 |
|                       |                                   | Park <i>et al.</i> , 2018             | M    | 3 |
|                       |                                   | Kreis, 2004                           | Nar  | 4 |
|                       | Shimming                          | Juchem <i>et al.</i> 2020             | Cons | 1 |
|                       |                                   | Wilson <i>et al.</i> , 2019           | Cons | 1 |
|                       |                                   | Öz <i>et al.</i> , 2020               | Cons | 1 |
|                       |                                   | Juchem et al 2017                     | SR   | 2 |
|                       |                                   | Grewal et al 2016                     | M    | 3 |
|                       |                                   | Saleh <i>et al.</i> , 2016            | M    | 3 |
|                       |                                   | Deelchand <i>et al.</i> , 2018;       | M    | 3 |
|                       |                                   | Sanaei Nezhad <i>et al.</i> ,<br>2018 | M    | 3 |
|                       | Order of scans<br>and field drift | Öz <i>et al.</i> , 2020               | Cons | 1 |
|                       |                                   | Andronesi <i>et al.</i> , 2020        | Cons | 1 |
|                       |                                   | Choi <i>et al.</i> , 2021             | Cons | 1 |
|                       |                                   | Cudalbu <i>et al.</i> , 2020          | Cons | 1 |
|                       |                                   | Mikkelsen <i>et al.</i> , 2017;       | MSS  | 2 |
|                       |                                   | Harris <i>et al.</i> , 2014a          | M    | 3 |
|                       |                                   | Edden <i>et al.</i> , 2016            | M    | 3 |
| <b>Confounders</b>    | Scanner site and<br>vendor        | Mikkelsen <i>et al.</i> , 2017;       | MSS  | 2 |
|                       |                                   | Mikkelsen <i>et al.</i> , 2019;       | MSS  | 2 |
|                       |                                   | Saleh <i>et al.</i> , 2019            | MSS  | 2 |
|                       | Macromolecules                    | Mullins <i>et al.</i> , 2014          | Cons | 1 |
|                       |                                   | Cudalbu <i>et al.</i> , 2020          | Cons | 1 |
|                       |                                   | Choi <i>et al.</i> , 2021             | Cons | 1 |
|                       |                                   | Henry <i>et al.</i> , 2001;           | M    | 3 |
|                       |                                   | Harris <i>et al.</i> , 2015a;         | M    | 3 |
|                       |                                   | Edden <i>et al.</i> , 2016;           | M    | 3 |

|                    |                                     |      |                |
|--------------------|-------------------------------------|------|----------------|
|                    | Mikkelsen <i>et al.</i> , 2016b;    | M    | 3              |
|                    | Shungu <i>et al.</i> , 2016;        | M    | 3              |
|                    | Gu <i>et al.</i> , 2018;            | M    | 3              |
|                    | Oeltzschner <i>et al.</i> , 2018a;  | M    | 3              |
|                    | Duncan <i>et al.</i> , 2019         | M    | 3              |
| Region             | Puts and Edden, 2012                | SR   | 1 <sup>T</sup> |
|                    | Harada <i>et al.</i> , 2011;        | M    | 4 <sup>T</sup> |
|                    | Waddell <i>et al.</i> , 2011;       | M    | 4 <sup>T</sup> |
|                    | Gao <i>et al.</i> , 2013;           | M    | 4 <sup>T</sup> |
|                    | van der Veen 2013;                  | M    | 4 <sup>T</sup> |
|                    | Harris <i>et al.</i> , 2015c;       | M    | 4 <sup>T</sup> |
|                    | Long <i>et al.</i> , 2015;          | M    | 4 <sup>T</sup> |
|                    | Greenhouse <i>et al.</i> , 2016;    | M    | 4 <sup>T</sup> |
|                    | Grewal <i>et al.</i> , 2016a;       | M    | 4 <sup>T</sup> |
|                    | Brix <i>et al.</i> , 2017;          | M    | 4 <sup>T</sup> |
|                    | Chen <i>et al.</i> , 2017b;         | M    | 4 <sup>T</sup> |
|                    | Porges <i>et al.</i> , 2017a;       | M    | 4 <sup>T</sup> |
|                    | Puts <i>et al.</i> , 2018;          | M    | 4 <sup>T</sup> |
|                    | Dhamala <i>et al.</i> , 2019        | M    | 4 <sup>T</sup> |
| Tissue Composition | Mullins <i>et al.</i> , 2014        | Cons | 1              |
|                    | Choi <i>et al.</i> , 2006;          | M    | 3              |
|                    | Bhattacharyya <i>et al.</i> , 2011; | M    | 3              |
|                    | Geramita <i>et al.</i> , 2011;      | M    | 3              |
|                    | Harris <i>et al.</i> , 2015b;       | M    | 3              |
|                    | Mikkelsen <i>et al.</i> , 2016a;    | M    | 3              |
|                    | Porges <i>et al.</i> , 2017b;       | M    | 3              |
|                    | Gasparovic <i>et al.</i> , 2018     |      |                |
|                    |                                     |      |                |
| Age                | Porges <i>et al.</i> , 2020;        | SR   | 1 <sup>T</sup> |
|                    | Aufhaus <i>et al.</i> , 2013a;      | M    | 3 <sup>T</sup> |
|                    | Gao <i>et al.</i> , 2013;           | M    | 3 <sup>T</sup> |
|                    | Porges <i>et al.</i> , 2017a;       | M    | 3 <sup>T</sup> |
|                    | Maes <i>et al.</i> , 2018;          | M    | 3 <sup>T</sup> |
|                    | Marenco <i>et al.</i> , 2018;       | M    | 3 <sup>T</sup> |
|                    | Simmonite <i>et al.</i> , 2019      | M    | 3 <sup>T</sup> |
| Sex                | Aufhaus <i>et al.</i> , 2013a;      | M    | 3 <sup>T</sup> |
|                    | Gao <i>et al.</i> , 2013;           | M    | 3 <sup>T</sup> |
|                    | Saleh <i>et al.</i> , 2017;         | M    | 3 <sup>T</sup> |
|                    | O'Gorman <i>et al.</i> , 2011a      | M    | 4 <sup>T</sup> |
| Medication         | Puts and Edden, 2012;               | SR   | 1 <sup>T</sup> |
|                    | Bhagwagar <i>et al.</i> , 2004;     | RCT  | 2 <sup>T</sup> |
|                    | Rothman <i>et al.</i> , 1993;       | M    | 4 <sup>T</sup> |
|                    | Petroff <i>et al.</i> , 1996a;      | M    | 3 <sup>T</sup> |

|                                  |                                          |                                       |      |                |
|----------------------------------|------------------------------------------|---------------------------------------|------|----------------|
|                                  |                                          | Petroff <i>et al.</i> , 1996b;        | M    | 3 <sup>T</sup> |
|                                  |                                          | Licata <i>et al.</i> , 2009;          | M    | 4 <sup>T</sup> |
|                                  |                                          | Cai <i>et al.</i> , 2012;             | M    | 4 <sup>T</sup> |
|                                  |                                          | Myers <i>et al.</i> , 2014            | M    | 4 <sup>T</sup> |
|                                  | <b>Potential<br/>Confounders</b>         |                                       |      |                |
|                                  | - Caffeine                               | Oeltzschner <i>et al.</i> ,<br>2018b; | M    | 4 <sup>T</sup> |
|                                  | - Nicotine                               | Epperson <i>et al.</i> , 2005;        | M    | 3 <sup>T</sup> |
|                                  |                                          | Schulte <i>et al.</i> , 2017;         | M    | 3 <sup>T</sup> |
|                                  | - Menstrual<br>Cycle                     | Epperson <i>et al.</i> , 2005;        | M    | 3 <sup>T</sup> |
|                                  |                                          | De Bondt <i>et al.</i> , 2015a        | M    | 3 <sup>T</sup> |
|                                  |                                          | Epperson <i>et al.</i> , 2002;        | M    | 4 <sup>T</sup> |
|                                  |                                          | Harada <i>et al.</i> , 2011;          | M    | 4 <sup>T</sup> |
| <b>Data<br/>Acquisition</b>      | Quality<br>assessment<br>during the scan | Öz <i>et al.</i> , 2020;              | Cons | 1              |
|                                  |                                          | Choi <i>et al.</i> , 2021             | Cons | 1              |
|                                  | Data Export                              | -                                     |      |                |
| <b>Quality and<br/>Reporting</b> | Quality Metrics                          | Mullins <i>et al.</i> , 2014;         | Cons | 1              |
|                                  |                                          | Wilson <i>et al.</i> , 2019;          | Cons | 1              |
|                                  |                                          | Öz <i>et al.</i> , 2020;              | Cons | 1              |
|                                  |                                          | Bolliger <i>et al.</i> , 2013;        | M    | 3              |
|                                  |                                          | Kreis, 2016;                          | M    | 3              |
|                                  |                                          | Chen <i>et al.</i> , 2017b;           | M    | 3              |
|                                  |                                          | Deelchand <i>et al.</i> , 2018        | M    | 3              |
|                                  | Reporting                                | Lin <i>et al.</i> , 2020;             | Cons | 1              |
|                                  |                                          | Peek <i>et al.</i> , 2020;            | SR   | 2              |
|                                  |                                          | Deelchand <i>et al.</i> , 2019        | M    | 3              |
| <b>Post-<br/>processing</b>      | Frequency and<br>Phase Correction        | Near <i>et al.</i> , 2020;            | Cons | 1              |
|                                  |                                          | Choi <i>et al.</i> , 2021;            | Cons | 1              |
|                                  |                                          | Edden and Barker,<br>2007;            | M    | 3              |
|                                  |                                          | Edden <i>et al.</i> , 2014b;          | M    | 3              |
|                                  |                                          | Harris <i>et al.</i> , 2014c;         | M    | 3              |
|                                  |                                          | Cleve <i>et al.</i> , 2015;           | M    | 3              |
|                                  |                                          | Near <i>et al.</i> , 2015;            | M    | 3              |
|                                  |                                          | van der Veen <i>et al.</i> ,<br>2017; | M    | 3              |
|                                  |                                          | Wiegers <i>et al.</i> , 2017;         | M    | 3              |
|                                  |                                          | Tapper <i>et al.</i> , 2019a          |      |                |

**Cons= consensus document; MSS= multi-site study SemT/P= seminal textbook/paper; SR= systematic review; M: methodological publication, Nar: Narrative.** Note levels of evidence documented with 'Level X<sup>T</sup>' are assessed using a traditional hierarchy of evidence (NHMRC, 2009) rather than the modified-hierarchy of evidence (Table 1).
